# Supplementary material for: Topical tacrolimus for the treatment of secondary lymphedema
Source: PubMed Central journal article supplement (PMC5309859; doi:10.1038/ncomms14345), 2017-02-10
Supplement: ncomms14345-s1.pdf [file ncomms14345-s1.pdf]

## Supplementary Figures

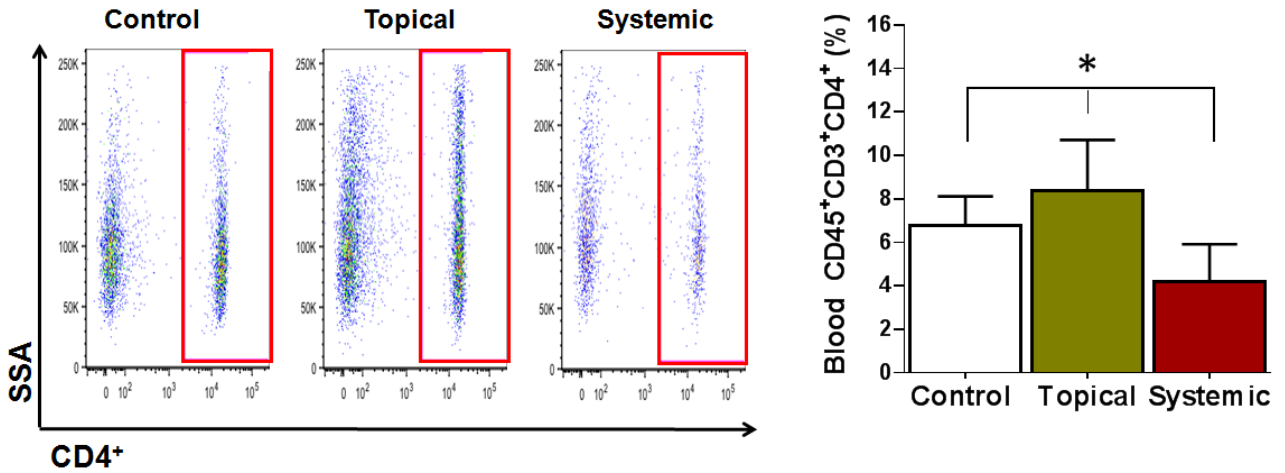

**Supplementary Fig. 1: Topical Tacrolimus does not decrease circulating CD4<sup>+</sup> T cells.** Representative flow plots of peripheral blood CD4<sup>+</sup> cells (left panel) with quantification of CD4<sup>+</sup> T cells (right-bar graph) shown after 2 week treatment with topical tacrolimus, systemic tacrolimus, or vehicle control. (n=6/group). Experiments were repeated 2 times. All data represent mean  $\pm$  s.d with  $p \leq 0.05$  considered as significant. Data analyzed by ANOVA with post hoc tests.

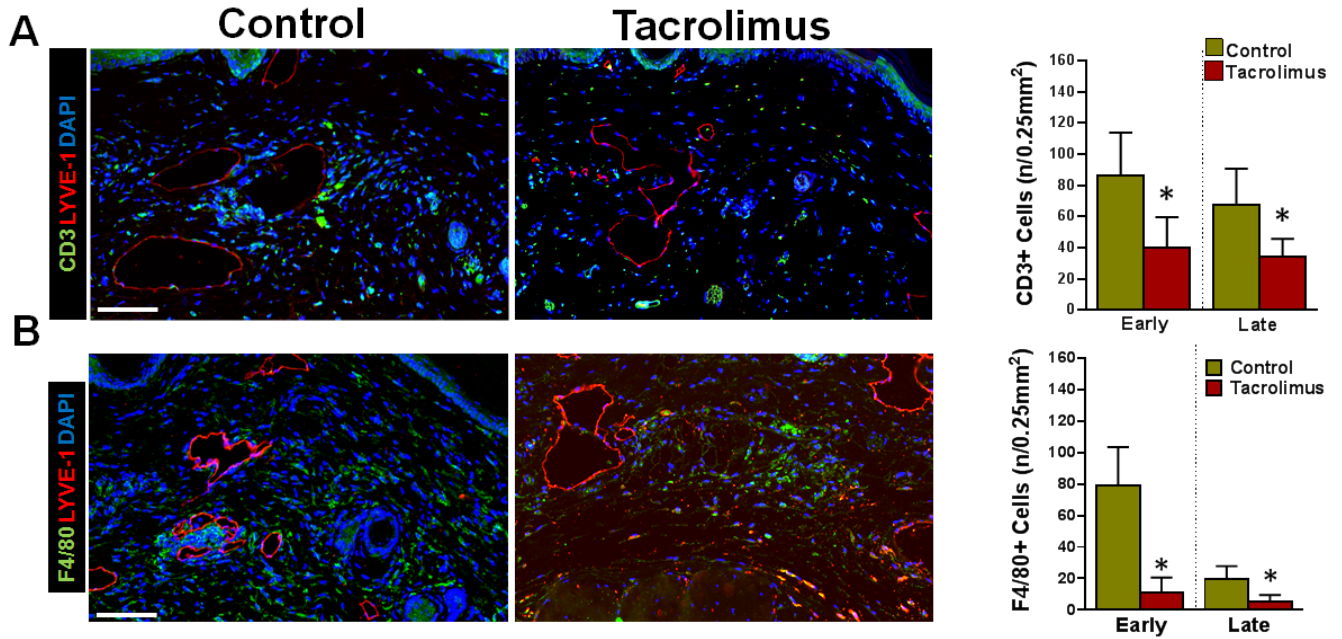

**Supplementary Fig. 2: Topical tacrolimus decreases T cell and macrophage infiltration in post-surgical lymphedema.**

**A.** Representative 40x images of tail tissue sections from control and early topical tacrolimus treated animals harvested 6 weeks after surgery with immunofluorescent localization of CD3<sup>+</sup> cells (green). Quantification for both early and late treatment experiments is shown to the right (n=6/group). **B.** Representative 40x images of tail tissue sections from control and early topical tacrolimus treated animals harvested 6 weeks after surgery with immunofluorescent localization of F4/80<sup>+</sup> cells (green). Quantification for both early and late treatment experiments is shown to the right (n=6/group). All experiments were repeated 2 times. All data represent mean  $\pm$  s.d with  $p \leq 0.05$  considered as significant. Data analyzed by 2-tailed student's t-Test. Scale=100 $\mu$ m.

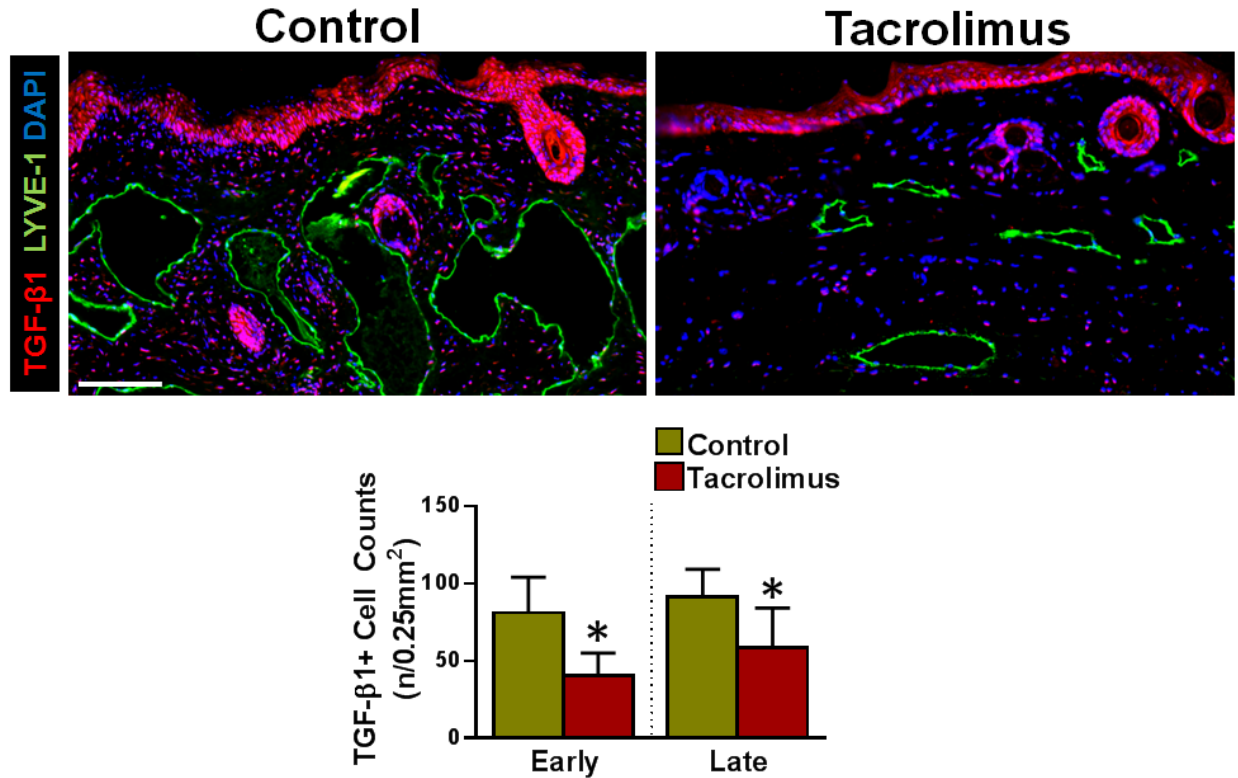

**Supplementary Fig. 3: Topical tacrolimus decreases infiltration of TGF-β1 producing cells in post-surgical lymphedema.** Representative 40x images of tail tissue sections from control and early topical tacrolimus treated animals harvested 6 weeks after surgery with immunofluorescent localization of TGF-β1<sup>+</sup> cells (red). Quantification for both early and late treatment experiments is shown below (n=6/group). All experiments were repeated 2 times. All data represent mean ± s.d with  $p \leq 0.05$  considered as significant. Data analyzed by 2-tailed student's t-Test. Scale=100μm.

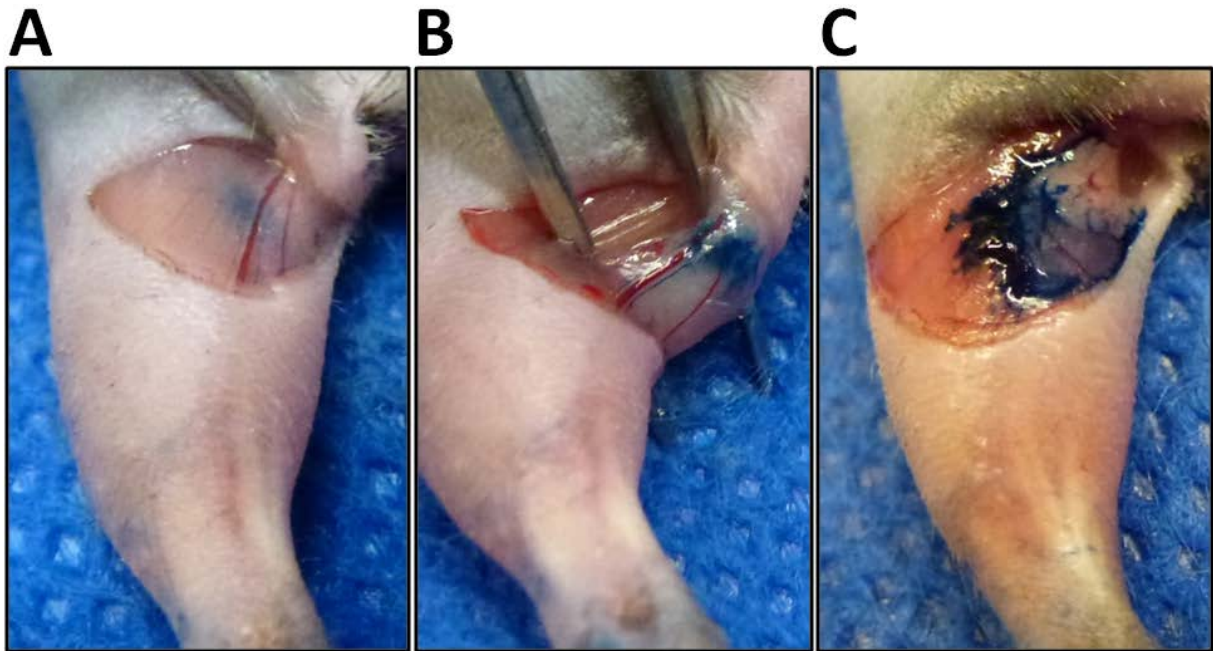

**Supplementary Fig. 4: Popliteal lymph node dissection model.**

- A.** The popliteal lymph node, filled with Evan's Blue dye, is visible in the popliteal fat pad.
- B.** The popliteal lymph node together with afferent and efferent collectors is isolated with its surrounding fat pad.
- C.** Following surgical resection Evans blue dye is seen spilling freely around the surgical site.

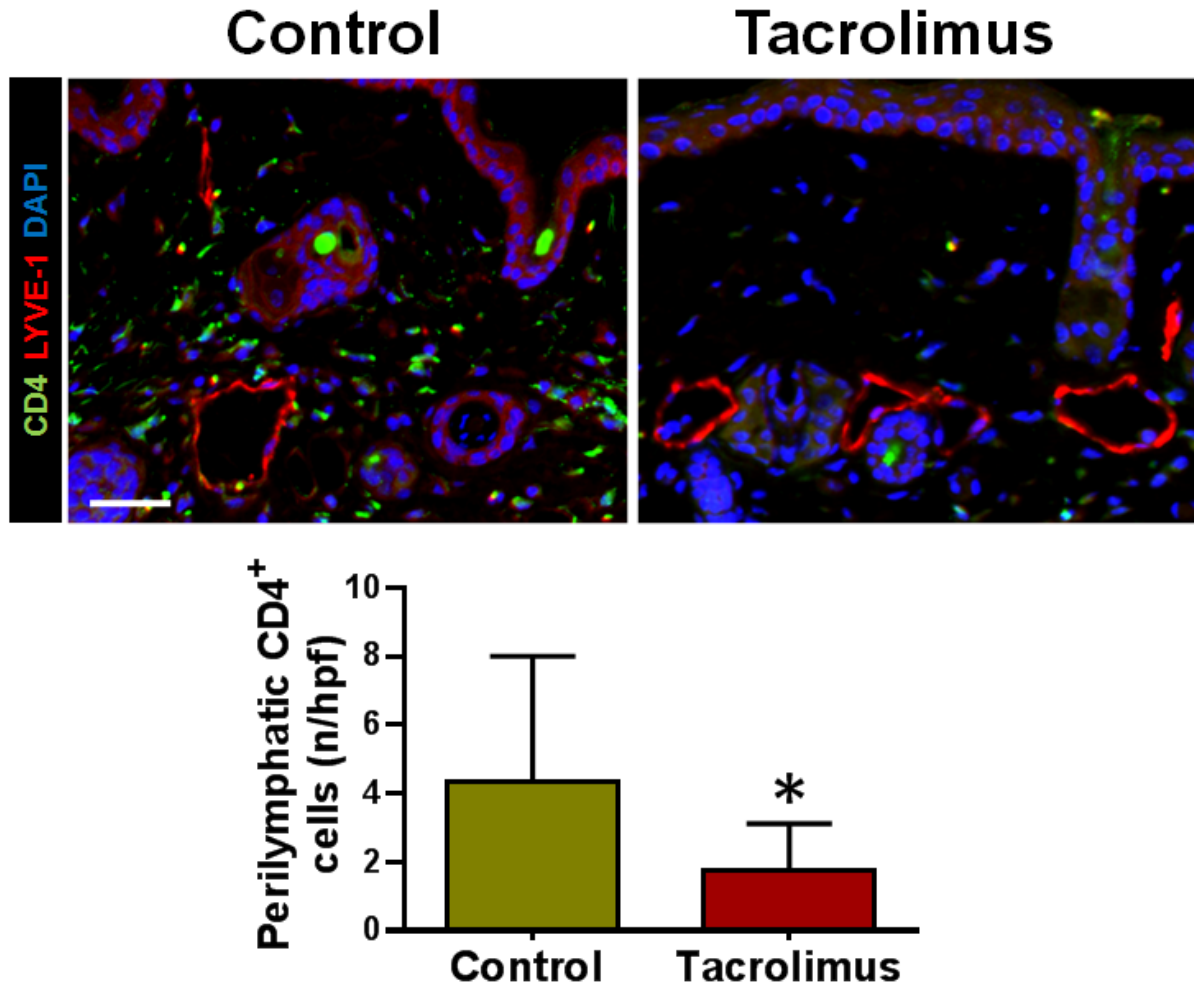

**Supplementary Fig. 5: Topical tacrolimus decreases perilymphatic CD4<sup>+</sup> cell infiltration after PLND.** Representative images of immunofluorescent localization of CD4<sup>+</sup> cells (green) and lymphatic vessels (LYVE-1<sup>+</sup> red) in animals treated with control or tacrolimus and harvested 4 weeks after PLND. Quantification is shown below (n=6/group). All experiments were repeated 2 times. All data represent mean  $\pm$  s.d with  $p \leq 0.05$  considered as significant. Data analyzed by 2-tailed student's t-Test. Scale=50 $\mu$ m.

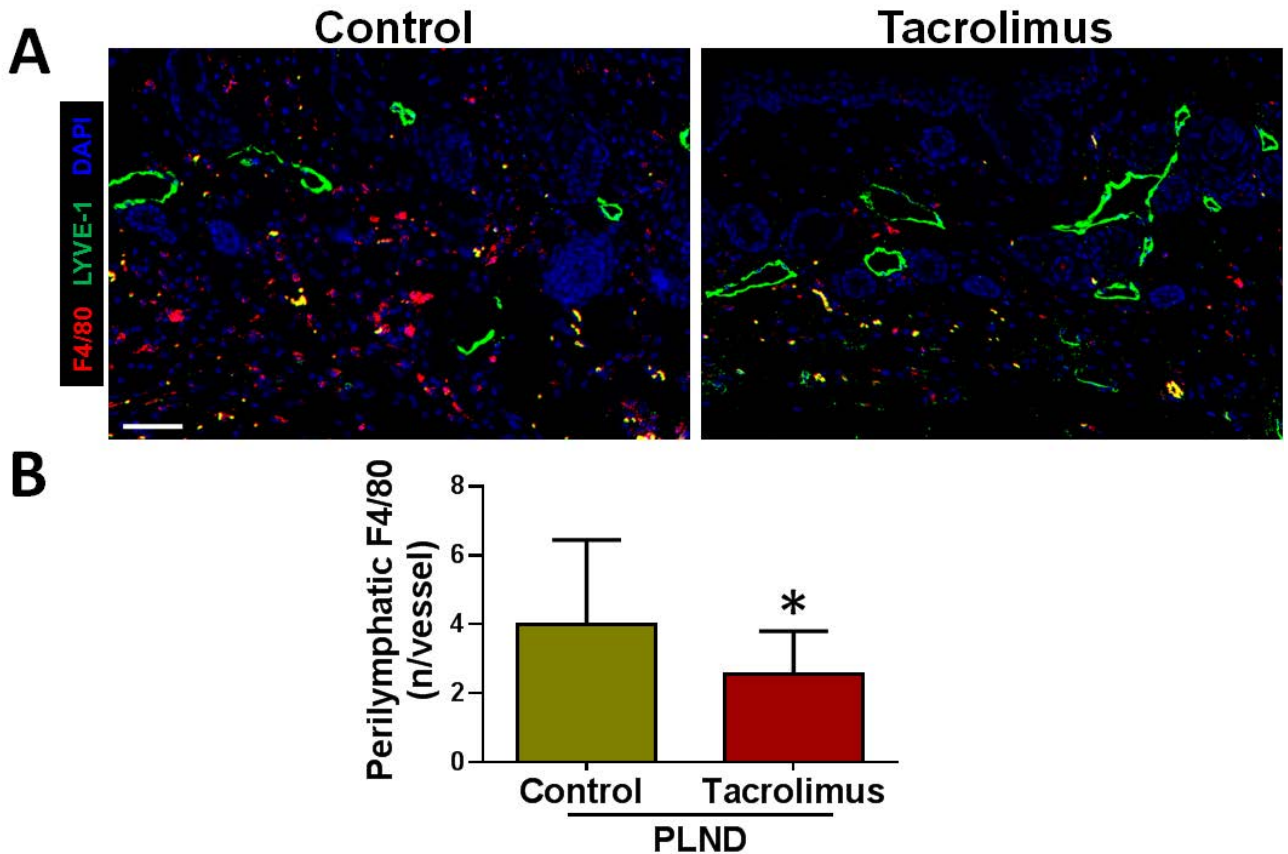

**Supplementary Fig. 6: Topical tacrolimus decreases perilymphatic F4/80<sup>+</sup> cell infiltration after PLND.**

- A.** Representative of immunofluorescent images of tacrolimus and vehicle treated PLND hindlimb skin tissues sections stained for lymphatic vessels (green) and macrophages (red).
- B.** Quantification of the perilymphatic F4/80<sup>+</sup> macrophages (n=6/group). All experiments were repeated 2 times. All data represent mean  $\pm$  s.d with  $p \leq 0.05$  considered as significant. Data analyzed by 2-tailed student's t-Test. Scale=50 $\mu$ m.

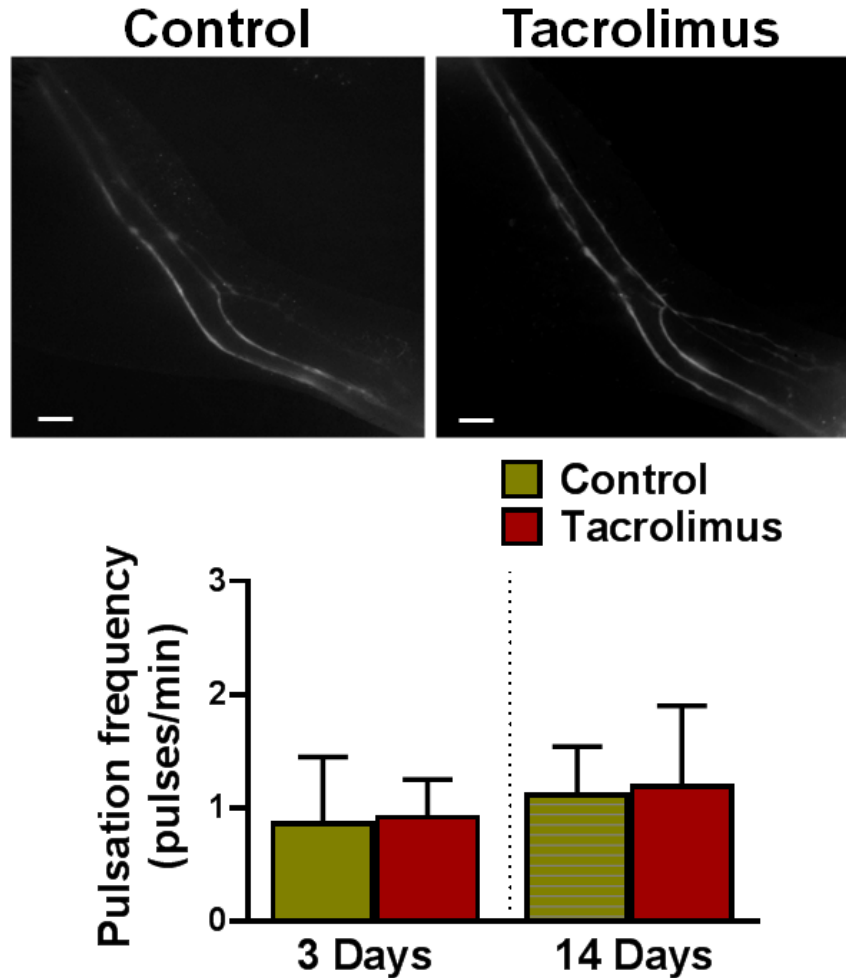

**Supplementary Fig. 7: Topical tacrolimus does not alter collecting lymphatic vessel pulsation or lymphangiogenesis in the absence of lymphatic injury or inflammation.**

Representative images of NIR lymphatic images of the hind limb lymphatics in sham operated mice (i.e. anesthesia without incision or PLND) following treatment with control or topical tacrolimus for 2 weeks. Quantification of collecting lymphatic vessel pulsation frequency following 3 or 14 days of treatment with tacrolimus is shown below. Video of pulsations can be found in Supplementary movie 2 (n=6/group). All experiments were repeated 2 times. All data represent mean  $\pm$  s.d with  $p \leq 0.05$  considered as significant. Data analyzed by 2-tailed student's t-Test. Scale=1mm.

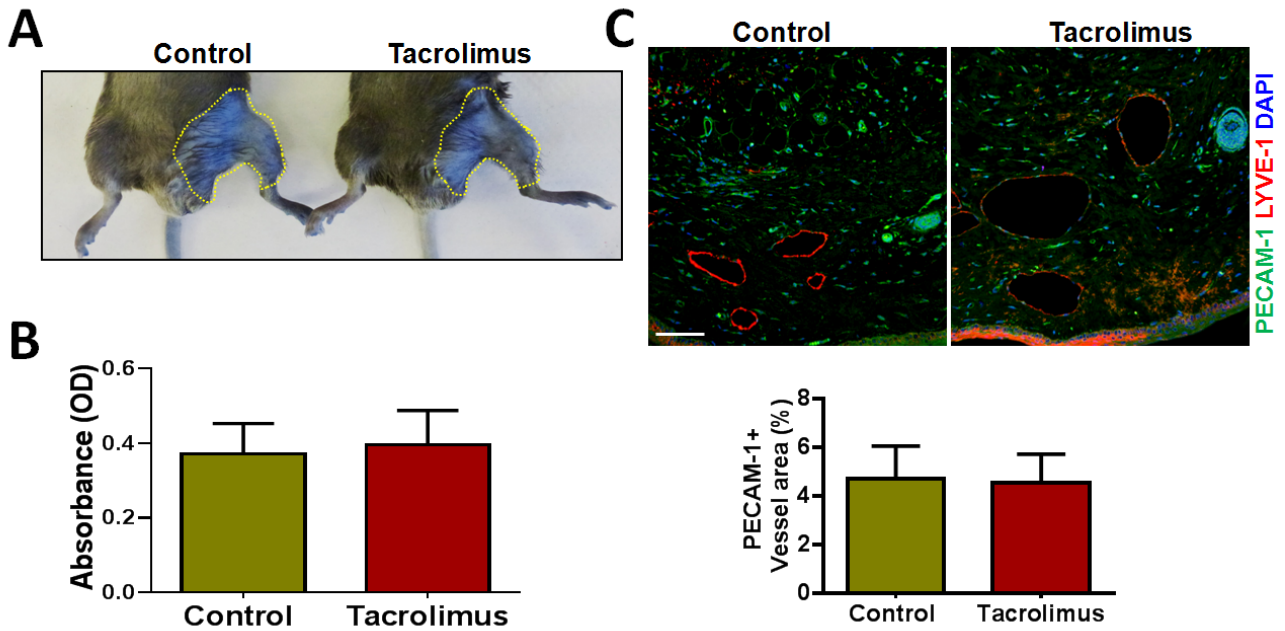

**Supplementary Fig. 8: Topical tacrolimus treatment does not alter vascular permeability or vascular density following lymphatic injury.**

- Representative gross images of tacrolimus or vehicle treated PLND mice hindlimbs after tail vein Evans blue injections to measure vascular permeability.
- Quantification of absorbance of formamide extracted Evans blue from tacrolimus and vehicle treated PLND hind limb tissues.
- Representative confocal images of tacrolimus or vehicle treated tail skin sections stained for blood vessel marker PECAM-1 (green) and the quantification for blood vessel density below ( $n=6/\text{group}$ ). All experiments were repeated 2 times. All data represent mean  $\pm$  s.d with  $p \leq 0.05$  considered as significant. Data analyzed by 2-tailed student's t-Test. Scale=100 $\mu\text{m}$ .



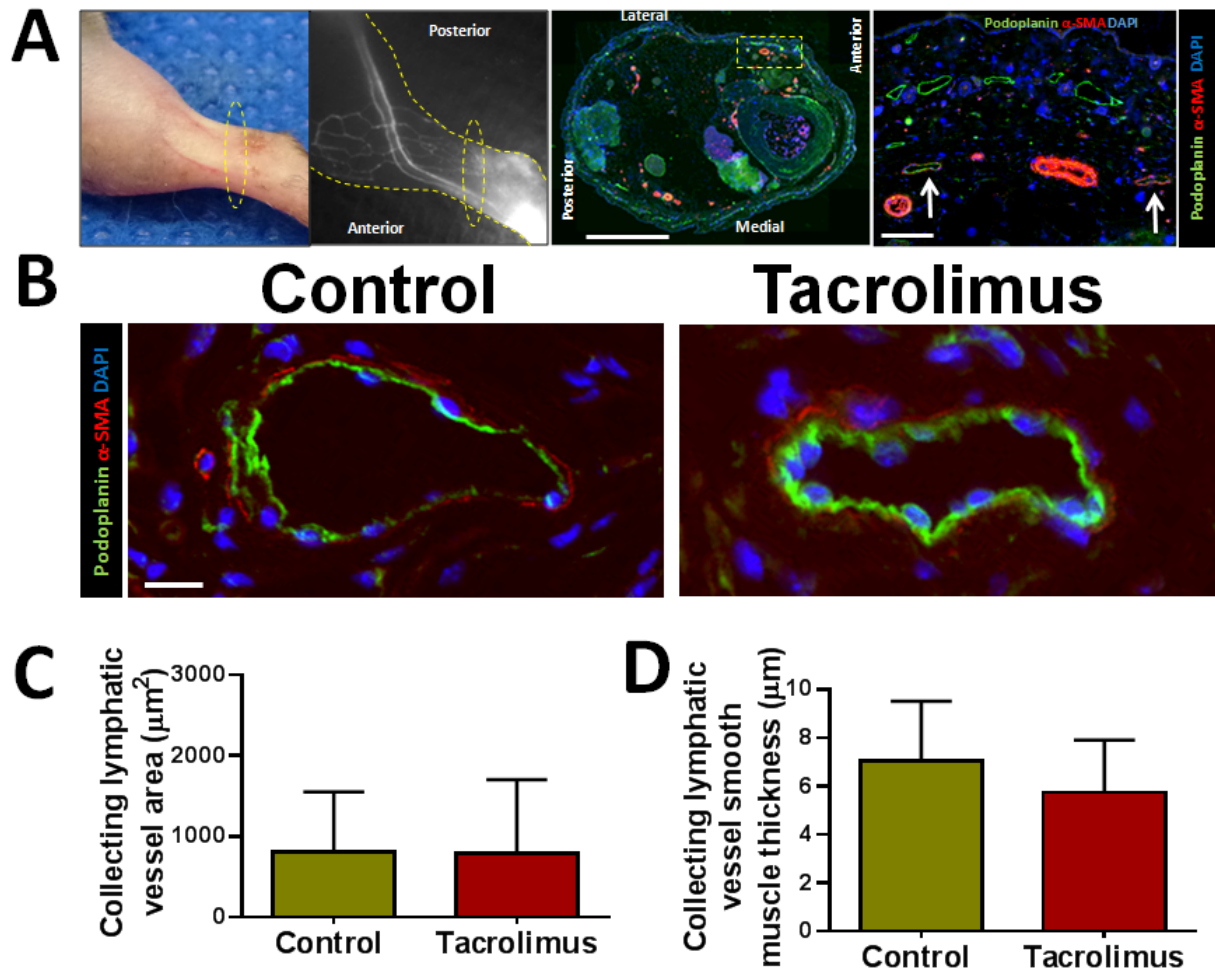

**Supplementary Fig. 9: Topical tacrolimus after PLND does not alter  $\alpha$ -SMA coverage or luminal diameter of hind limb lymphatic collectors.**

**A.** (Images from left to right) Brightfield image of the lateral aspect of a mouse hind limb with the level of the cross-sections shown by the yellow ellipse. NIR image of a mouse hind limb showing the anatomy of lymphatic vessels of the hind limb, with two large-caliber vessels on the lateral aspect. A 5x IF image of a mouse hind limb with a yellow box indicating the anterolateral leg, where the two dominant collecting lymphatic vessels are located. A 20x image of the region in which the dominant collecting vessels are located (shown with white arrows). Scale= 1mm (middle), 100 $\mu\text{m}$  (far right).

- B.** Representative 100x images of cross-sections of the collecting lymphatic vessels after dual immunofluorescent staining for Podoplanin (Green) and  $\alpha$ -SMA (Red). Scale=10 $\mu$ m.
- C.** Quantification of luminal area.
- D.** Quantification of the thickness of  $\alpha$ -SMA (n=6/group). All experiments were repeated 2 times. All data represent mean  $\pm$  s.d with  $p \leq 0.05$  considered as significant. Data analyzed by 2-tailed student's t-Test.

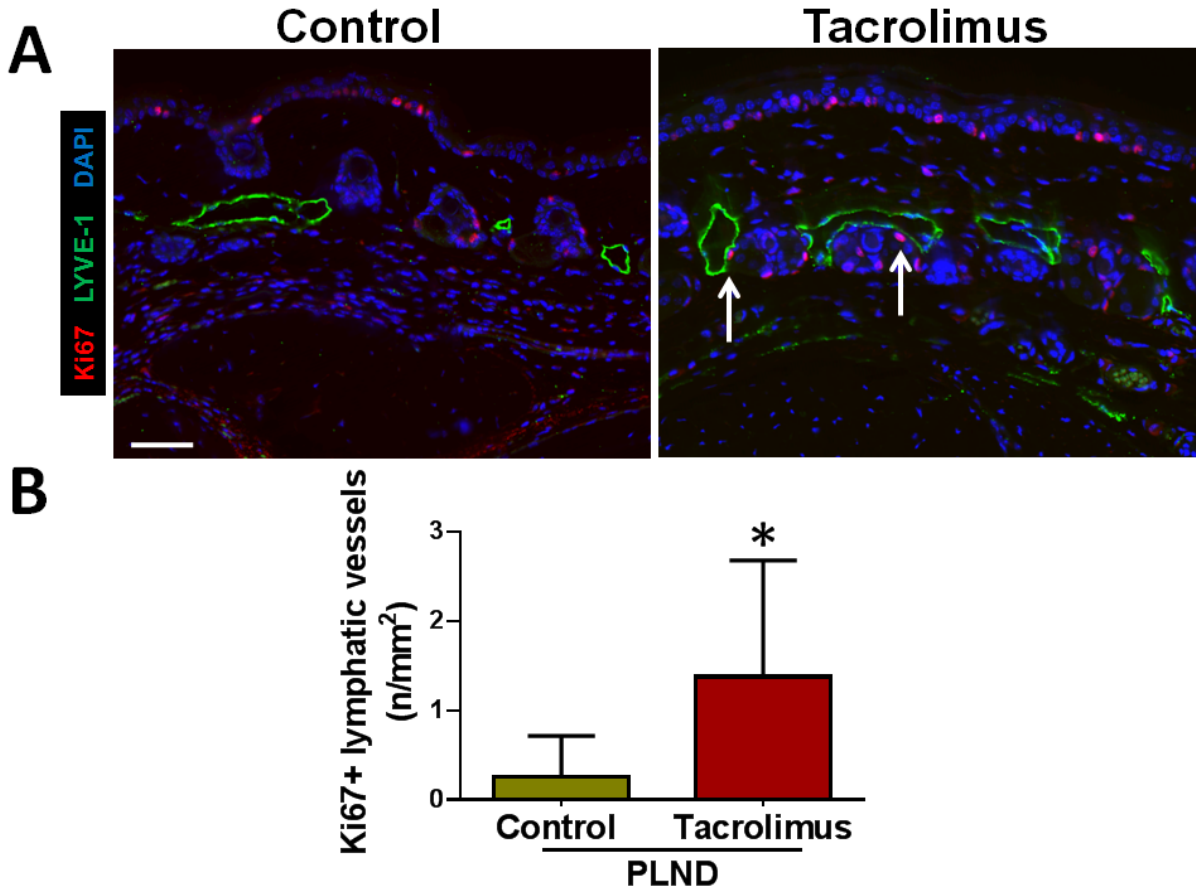

**Supplementary Fig. 10: Topical tacrolimus increases Ki67+ cells in lymphatic vessels in the setting of lymphatic injury.**

- A.** Representative of immunofluorescent images of tacrolimus and vehicle treated PLND hindlimb skin tissues sections stained for lymphatic vessels (green) and a marker of proliferation (Ki67; red). Ki67+ cells in lymphatic vessel walls are indicated with white arrows.
- B.** Quantification of the percentage of lymphatic vessels expressing Ki67 positivity (n=6/group). All experiments were repeated 2 times. All data represent mean  $\pm$  s.d with  $p \leq 0.05$  considered as significant. Data analyzed by 2-tailed student's t-Test. Scale=50 $\mu$ m

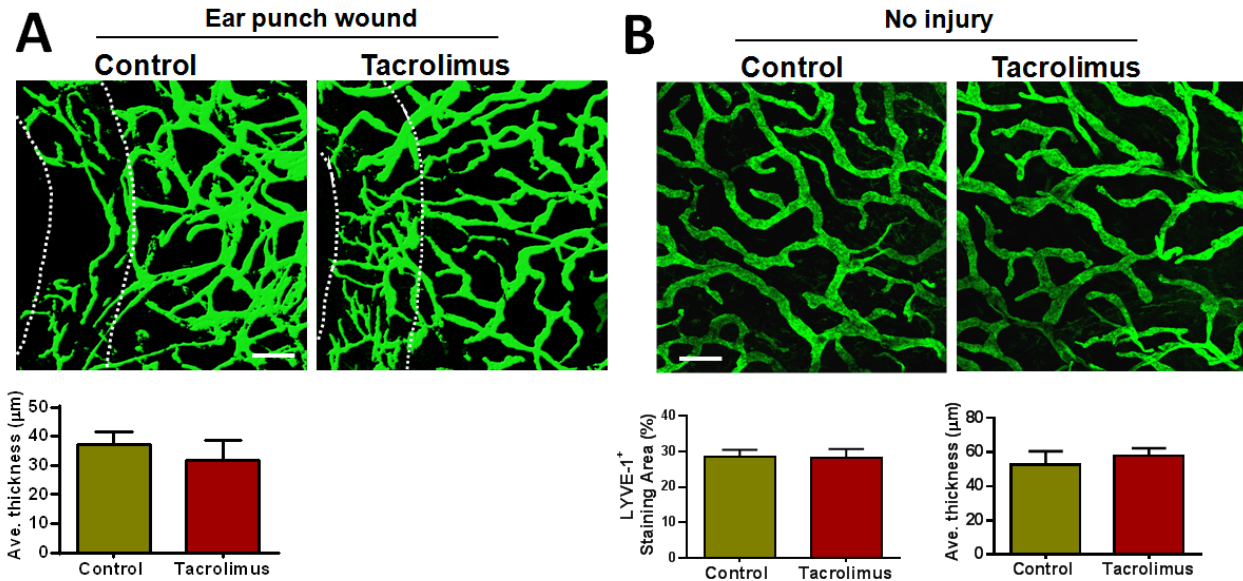

**Supplementary Fig. 11: Topical tacrolimus has no effect on lymphatic vessel morphology during injury and lymphatic vessel density in absence of injury respectively**

- A.** Representative surface rendered confocal images of immunofluorescent staining of lymphatic vessels (LYVE-1; green) in punch wound ear skin after 4 weeks of application of topical tacrolimus or vehicle control. Quantification of lymphatic vessel thickness 400  $\mu\text{m}$  around the wound margin shown below.
- B.** Representative confocal images of immunofluorescent staining of lymphatic vessels (LYVE-1; green) in unwounded mouse ears after 4 weeks of application of topical tacrolimus or vehicle control. Quantification of the LYVE-1<sup>+</sup> staining area and vessel thickness is shown to below. (n=6/group). All experiments were repeated 2 times. All data represent mean  $\pm$  s.d with  $p \leq 0.05$  considered as significant. Data analyzed by 2-tailed student's t-Test. Scale=200  $\mu\text{m}$ .

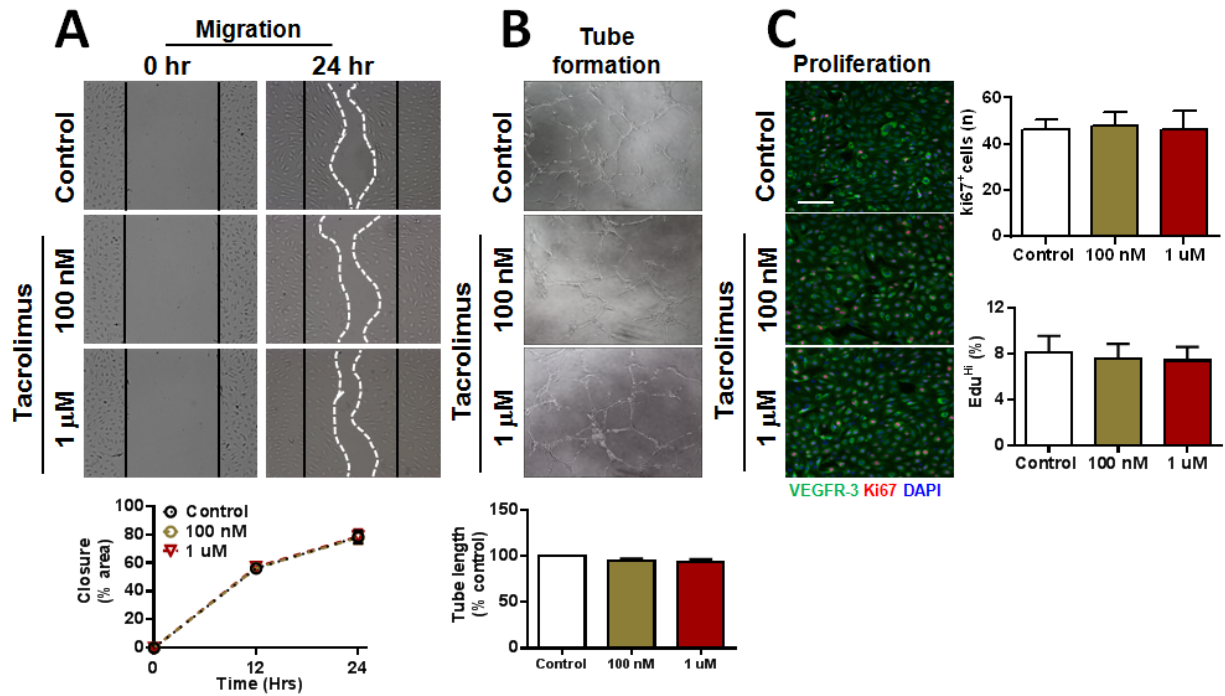

**Supplementary Fig. 12: Tacrolimus has no direct effect on LECs migration, tube formation and proliferation.**

- A. Representative phase contrast images of control and tacrolimus treated LECs, at 0 hr and 24 hr after scratch wound. Quantification of the wound closure below.
- B. Representative phase contrast images of control and tacrolimus treated LECs tubules on matrigel 24 hr after seeding. Quantification of the tube length below.
- C. Representative confocal images of control or tacrolimus treated LECs monolayers stained for proliferation marker (Ki67; red) LECs (VEGFR3; green). Quantification of the Ki67<sup>+</sup> cells (top). Bar graph showing the flow cytometry analyzed Edu<sup>+</sup> cells from control or tacrolimus treated LECs (Below). (n=6/group). All experiments were repeated 2 times. All data represent mean  $\pm$  s.d with  $p \leq 0.05$  considered as significant. Data analyzed by 2-tailed student's t-Test. Scale=100  $\mu$ m.
